# Supplementary material for: Common Features Between the Proteomes of Floral and Extrafloral Nectar From the Castor Plant (Ricinus Communis) and the Proteomes of Exudates From Carnivorous Plants
Source: Front Plant Sci. 2018 Apr 27;9:549. doi: 10.3389/fpls.2018.00549 (PMC5934526; doi:10.3389/fpls.2018.00549)
Supplement: Supplementary file 1 [file Table_1.XLSX]

## Sheet: STI
Supplementary table 1 – Proteins identified in EFN, FN or in both nectars (FN and EFN) of castor plants (Ricinus communis). The number of biological replicates is present in the “Biological Replicate” column (e.g. FN3 – floral nectar biological replicate 3). Accession and Description columns show the proteins identified employing the proteomics strategy using the Ricinus communis database in the …
Sample	Biological replicate	Identified Proteins (Accession)	Identified Proteins (Description)	Top Hit Domain Description (PFAM)	Accession Blastp (Uniprot)	Description Blastp (Uniprot)	Accession Blastp (NCBI)	Description Blastp (NCBI)	Loc (TargetP)	Unique Peptides	Floral Nectar Areas (XIC)				Average	Extra Floral Nectar Areas (XIC)			Average	Fold Change	T-Test (p-value)
FN	FN3;FN4	B9RQ33	5-methyltetrahydropteroyltriglutamate--homocysteine methyltransferase, putative OS=Ricinus communis GN=RCOM_0952830 PE=3 SV=1	Cobalamin-independent synthase, Catalytic domain	-	-	-	-	C	1			4100000	4700000	4000000
FN	FN3;FN4	B9S0I6	DNA binding protein, putative OS=Ricinus communis GN=RCOM_1355220 PE=4 SV=1	Myb-like DNA-binding domain	-	-	-	-	*	1			170000000	320000000	200000000
FN	FN1;FN2;FN3;FN4	B9SJ71	Hydrolase, acting on ester bonds, putative OS=Ricinus communis GN=RCOM_1477980 PE=4 SV=1	Phosphoesterase family	-	-	XP_015578999	Non-specific Phospholipase C2 (Ricinus communis)	*	10	15000000	1700000	6100000	15000000	9000000
FN	FN3;FN4	B9SBL2	Multicopper oxidase, putative OS=Ricinus communis GN=RCOM_0341680 PE=4 SV=1	Multicopper oxidase	-	-	-	-	S	1			20000000	7900000	10000000
FN	FN3;FN4	B9SKK5	Nucleoside diphosphate kinase OS=Ricinus communis GN=RCOM_0658170 PE=3 SV=1	Nucleoside diphosphate kinase	-	-	-	-	_	1			3000000	2300000	3000000
FN	FN3;FN4	B9SCN6	Putative uncharacterized protein OS=Ricinus communis GN=RCOM_0476330 PE=4 SV=1	ATP10 protein	A0A061GWT1	Mitochondria isoform 1 (Theobroma cacao)		-	*	1			570000000	980000000	800000000
FN	FN3;FN4	B9RG09	Transaldolase, putative OS=Ricinus communis GN=RCOM_1438460 PE=3 SV=1	Transaldolase/Fructose-6-phosphate aldolase	-	-	-	-	C	1			73000000	240000000	200000000
EFN	EFN1;EFN2	B9RIP2	Acidic endochitinase SE2, putative OS=Ricinus communis GN=RCOM_1581400 PE=3 SV=1	Glycosyl hydrolases family 18	-	-	-	-	S	3						160000000	91000000		125500000
EFN	EFN1;EFN2	B9T7M3	Alpha-glucosidase, putative OS=Ricinus communis GN=RCOM_0252330 PE=3 SV=1	Glycosyl hydrolases family 31	-	-	-	-	S	3						2200000	3700000		2950000
EFN	EFN1;EFN2	B9T719	Aspartic proteinase nepenthesin-1, putative OS=Ricinus communis GN=RCOM_0310740 PE=3 SV=1	Xylanase inhibitor N-terminal	-	-	-	-	S	2						5100000	6200000		5650000
EFN	EFN1;EFN2	B9RNR8	Aspartic proteinase nepenthesin-2, putative OS=Ricinus communis GN=RCOM_0920310 PE=3 SV=1	Xylanase inhibitor N-terminal	-	-	-	-	S	1						2300000	6500000		4400000
EFN	EFN1;EFN2	B9RTU8	Basic 7S globulin 2 small subunit, putative OS=Ricinus communis GN=RCOM_0912850 PE=3 SV=1	Xylanase inhibitor C-terminal	-	-	-	-	S	5						8500000	28000000		18250000
EFN	EFN1;EFN2	B9R9R9	Beta-fructofuranosidase, soluble isoenzyme I, putative OS=Ricinus communis GN=RCOM_1500230 PE=3 SV=1	Glycosyl hydrolases family 32 N-terminal domain	-	-	-	-	_	2						3300000	4800000		4050000
EFN	EFN1;EFN2	B9RIY8	Beta-glucosidase, putative OS=Ricinus communis GN=RCOM_1752040 PE=4 SV=1	Glycosyl hydrolase family 3 C-terminal domain	-	-	-	-	S	4						4800000	5400000		5100000
EFN	EFN1;EFN3	B9SNP5	Carboxypeptidase OS=Ricinus communis GN=RCOM_1025080 PE=3 SV=1	Serine carboxypeptidase	-	-	-	-	S	1						3500000		900000	2200000
EFN	EFN1;EFN2	B9S377	Ceramidase, putative OS=Ricinus communis GN=RCOM_0731110 PE=4 SV=1	Neutral/alkaline non-lysosomal ceramidase, N-terminal	-	-	-	-	S	2						2800000	2000000		2400000
EFN	EFN1;EFN2	B9S6S0	Class I chitinase, putative OS=Ricinus communis GN=RCOM_0872340 PE=3 SV=1	Chitinase class I	-	-	-	-	*	4						83000000	14000000		48500000
EFN	EFN1;EFN2	B9T8H9	Class IV chitinase, putative OS=Ricinus communis GN=RCOM_0073080 PE=3 SV=1	Chitinase class I	-	-	-	-	S	3						5400000	9500000		7450000
EFN	EFN1;EFN2	B9RNV2	Early nodulin 55-2, putative OS=Ricinus communis GN=RCOM_0920850 PE=4 SV=1	Plastocyanin-like domain	-	-	-	-	S	1						4900000	23000000		13950000
EFN	EFN1;EFN2	B9RYU9	Endoglucanase OS=Ricinus communis GN=RCOM_1313620 PE=3 SV=1	Glycosyl hydrolase family 9	-	-	-	-	S	11						71000000	24000000		47500000
EFN	EFN1;EFN2	B9SRG1	Enolase, putative OS=Ricinus communis GN=RCOM_0382120 PE=3 SV=1	Enolase, C-terminal TIM barrel domain	-	-	-	-	*	3						4000000	1900000		2950000
EFN	EFN1;EFN2	B9T103	Glucan endo-1,3-beta-glucosidase, putative OS=Ricinus communis GN=RCOM_0372050 PE=3 SV=1	Glycosyl hydrolases family 17	-	-	-	-	S	1						7300000	900000		4100000
EFN	EFN1;EFN2	B9SU04	Glucan endo-1,3-beta-glucosidase, putative OS=Ricinus communis GN=RCOM_0753130 PE=3 SV=1	Glycosyl hydrolases family 17	-	-	-	-	S	2						8000000	15000000		11500000
EFN	EFN1;EFN2	B9RIP3	Hevamine-A, putative OS=Ricinus communis GN=RCOM_1581410 PE=3 SV=1	Glycosyl hydrolases family 18	-	-	-	-	S	5						24000000	2200000		13100000
EFN	EFN2;EFN3	B9REF0	Hydrolase, hydrolyzing O-glycosyl compounds, putative OS=Ricinus communis GN=RCOM_1620930 PE=4 SV=1	X8 domain	-	-	-	-	S	1							38000000	6600000	22300000
EFN	EFN1;EFN2	B9T6Y3	Monodehydroascorbate reductase, putative OS=Ricinus communis GN=RCOM_0014310 PE=4 SV=1	Pyridine nucleotide-disulphide oxidoreductase	-	-	-	-	*	1						3200000	1700000		2450000
EFN	EFN1;EFN2	B9R8I7	Multicopper oxidase, putative OS=Ricinus communis GN=RCOM_1600150 PE=4 SV=1	Multicopper oxidase	-	-	-	-	S	5						5000000	4200000		4600000
EFN	EFN1;EFN2	B9T3Q0	Non-specific lipid-transfer protein OS=Ricinus communis GN=RCOM_0377480 PE=3 SV=1	Protease inhibitor/seed storage/LTP family	-	-	-	-	S	2						15000000	5700000		10350000
EFN	EFN1;EFN2	B9SRS0	Non-specific lipid-transfer protein OS=Ricinus communis GN=RCOM_1056770 PE=3 SV=1	Protease inhibitor/seed storage/LTP family	-	-	-	-	S	1						15000000	14000000		14500000
EFN	EFN1;EFN2	B9RC64	Osmotin, putative OS=Ricinus communis GN=RCOM_1685830 PE=4 SV=1	Thaumatin family	-	-	-	-	*	5						83000000	44000000		63500000
EFN	EFN1;EFN2	B9SAU3	Pectinesterase OS=Ricinus communis GN=RCOM_1179060 PE=4 SV=1	Pectinesterase	-	-	-	-	S	1						2900000	20000000		11450000
EFN	EFN1;EFN2	B9RD90	Pectinesterase OS=Ricinus communis GN=RCOM_1611040 PE=4 SV=1	Pectinesterase	-	-	-	-	S	9						53000000	48000000		50500000
EFN	EFN1;EFN2	B9SE97	Peroxidase OS=Ricinus communis GN=RCOM_0960960 PE=3 SV=1	Peroxidase	-	-	-	-	*	1						660000	1100000		880000
EFN	EFN1;EFN2	B9RFP1	Polygalacturonase, putative OS=Ricinus communis GN=RCOM_1436160 PE=3 SV=1	Glycosyl hydrolases family 28	-	-	-	-	S	2						3300000	6700000		5000000
EFN	EFN1;EFN2	B9S9S6	Putative uncharacterized protein OS=Ricinus communis GN=RCOM_0521900 PE=4 SV=1	Fasciclin domain	A0A1Q3BLG5	Fasciclin domain-containing protein (Cephalotus follicularis)	XP_002522745.1	fasciclin-like arabinogalactan protein 1 (Ricinus Communis)	C	5						13000000	4500000		8750000
EFN	EFN1;EFN2	B9S447	Putative uncharacterized protein OS=Ricinus communis GN=RCOM_0558740 PE=4 SV=1	Xylanase inhibitor N-terminal	A0A1U8LSP6	basic 7S globulin 2-like (Gossypium hirsutum)	-	-	S	1						4200000	7600000		5900000
EFN	EFN1;EFN2	B9RJM9	Putative uncharacterized protein OS=Ricinus communis GN=RCOM_1036610 PE=4 SV=1	Phosphate-induced protein 1 conserved region	A0A061FF48	EXORDIUM like 2 (Theobroma cacao)	-	-	S	6						14000000	5600000		9800000
EFN	EFN1;EFN2	B9RK70	Putative uncharacterized protein OS=Ricinus communis GN=RCOM_1046950 PE=4 SV=1	Protein tyrosine kinase	U5FFI2	Kinase family protein (Populus trichocarpa)	-	-	S	1						1300000	64000000		32650000
EFN	EFN1;EFN2	B9T0V5	Putative uncharacterized protein OS=Ricinus communis GN=RCOM_1439690 PE=4 SV=1	Ferritin-like domain	A0A1Q3C1E8	Ferritin_2 domain-containing protein (Cephalotus follicularis)	XP_002531874.1	PREDICTED: desiccation-related protein PCC13-62 (Ricinus communis)	S	1						88000000	37000000		62500000
EFN	EFN1;EFN2	B9SAZ6	Reticuline oxidase, putative OS=Ricinus communis GN=RCOM_1335350 PE=4 SV=1	FAD binding domain	-	-	-	-	*	6						8000000	3100000		5550000
EFN	EFN1;EFN2;EFN3	B9SB02	Reticuline oxidase, putative OS=Ricinus communis GN=RCOM_1335910 PE=4 SV=1	FAD binding domain	-	-	-	-	S	17						61000000	24000000	8800000	3.12667e+07
EFN	EFN1;EFN2	B9S815	Serine carboxypeptidase, putative OS=Ricinus communis GN=RCOM_1383690 PE=3 SV=1	Serine carboxypeptidase	-	-	-	-	S	2						2300000	6300000		4300000
EFN	EFN1;EFN2	B9T2C7	Serine-threonine protein kinase, plant-type, putative OS=Ricinus communis GN=RCOM_0404940 PE=4 SV=1	Leucine Rich repeats (2 copies)	-	-	XP_002532396.1	PREDICTED: polygalacturonase inhibitor (Ricinus communis)	S	1						8400000	6100000		7250000
EFN	EFN1;EFN2	B9S7U9	STS14 protein, putative OS=Ricinus communis GN=RCOM_1381930 PE=3 SV=1	Cysteine-rich secretory protein family	-	-	XP_002522065.1	PREDICTED: basic form of pathogenesis-related protein 1 (Ricinus communis)	S	3						2200000000	54000000		1127000000
EFN	EFN1;EFN2	B9REW9	Superoxide dismutase [Cu-Zn] OS=Ricinus communis GN=RCOM_1429430 PE=3 SV=1	Copper/zinc superoxide dismutase (SODC)	-	-	-	-	*	3						3400000	7300000		5350000
EFN	EFN1;EFN2	B9T4J8	Xylem serine proteinase 1, putative OS=Ricinus communis GN=RCOM_0396690 PE=4 SV=1	Subtilase family	-	-	-	-	S	3						5100000	1900000		3500000
EFN	EFN1;EFN2	B9R726	Xylem serine proteinase 1, putative OS=Ricinus communis GN=RCOM_1588040 PE=4 SV=1	Subtilase family	-	-	-	-	S	5						5100000	6200000		5650000
EFN	EFN1;EFN2	B9SQQ6	Zinc finger protein, putative OS=Ricinus communis GN=RCOM_0839630 PE=4 SV=1	GDSL-like Lipase/Acylhydrolase	-	-	XP_002528325.1	PREDICTED: GDSL esterase/lipase At2g40250 isoform X1 (Ricinus communis)	*	2						59000000	3700000		31350000
EFN	EFN1;EFN2	B9RM21	Zinc finger protein, putative OS=Ricinus communis GN=RCOM_1077210 PE=4 SV=1	GDSL-like Lipase/Acylhydrolase	-	-	XP_002514790.1	PREDICTED: GDSL esterase/lipase At2g31550 (Ricinus communis)	S	3						9600000	8700000		9150000
FN and EFN	FN1;FN2;FN4/EFN1;EFN2	B9RZI8	Alpha/beta hydrolase, putative OS=Ricinus communis GN=RCOM_0939790 PE=4 SV=1	Alpha/beta hydrolase family	-	-	-	-	S	5	250000000	54000000			152000000	490000000	1300000000		895000000	5.89	0.22
FN and EFN	FN1;FN2;FN4/EFN1;EFN2	B9RNR9	Aspartic proteinase nepenthesin-2, putative OS=Ricinus communis GN=RCOM_0920320 PE=3 SV=1	Xylanase inhibitor N-terminal	-	-	-	-	_	7	22000000	8800000		27000000	1.92667e+07	63000000	45000000		54000000	2.8	0.04
FN and EFN	FN2;FN3;FN4/EFN1;EFN2;EFN3	B9T494	Auxin-induced in root cultures protein 12, putative OS=Ricinus communis GN=RCOM_0318590 PE=4 SV=1	Protein of unknown function (DUF568)	-	-	-	-	S	2		3100000	7900000	19000000	10000000	7300000	8900000	5800000	7.33333e+06	0.73	0.61
FN and EFN	FN1;FN2;FN3;FN4/EFN1;EFN2	B9T346	Carbonic anhydrase, putative OS=Ricinus communis GN=RCOM_0142410 PE=4 SV=1	Eukaryotic-type carbonic anhydrase	-	-	-	-	S	12	180000000	12000000	32000000	24000000	62000000	1400000000	390000000		895000000	14.44	0.06
FN and EFN	FN1;FN2;FN4/EFN1;EFN2	B9SBZ8	Chitinase, putative OS=Ricinus communis GN=RCOM_0701150 PE=4 SV=1	Glycosyl hydrolases family 18	-	-	-	-	S	11	300000000	6400000		23000000	109800000	460000000	240000000		350000000	3.19	0.2
FN and EFN	FN1;FN2;FN4/EFN1;EFN2	B9RGE3	Disease resistance protein RPM1, putative OS=Ricinus communis GN=RCOM_1453360 PE=3 SV=1	NB-ARC domain	-	-	-	-	*	1	12000000	3400000		15000000	1.01333e+07	14000000	85000000		49500000	4.88	0.24
FN and EFN	FN1;FN2/EFN1;EFN2	B9RPP7	DUF26 domain-containing protein 2, putative OS=Ricinus communis GN=RCOM_1548470 PE=4 SV=1	Salt stress response/antifungal	-	-	-	-	S	7	12000000	2500000			7250000	22000000	24000000		23000000	3.17	0.08
FN and EFN	FN3;FN4/EFN1;EFN2	B9RWF4	Elongation factor 1-alpha OS=Ricinus communis GN=RCOM_1019090 PE=3 SV=1	Elongation factor Tu GTP binding domain	-	-	-	-	_	2			15000000	17000000	16000000	7600000	3900000		5750000	0.36	0.04
FN and EFN	FN1;FN2;FN4/EFN1;EFN2	B9T6M9	Glucan endo-1,3-beta-glucosidase, basic isoform, putative OS=Ricinus communis GN=RCOM_1277490 PE=3 SV=1	Glycosyl hydrolases family 17	-	-	-	-	*	14	67000000	11000000		8900000	2.89667e+07	410000000	84000000		247000000	8.53	0.18
FN and EFN	FN1;FN3;FN4/EFN1;EFN2;EFN3	B9RBE5	Glucan endo-1,3-beta-glucosidase, putative OS=Ricinus communis GN=RCOM_1674960 PE=3 SV=1	Glycosyl hydrolases family 17	-	-	-	-	S	9	21000000		2600000	6200000	9.93333e+06	48000000	23000000	1200000	2.40667e+07	2.42	0.39
FN and EFN	FN1;FN3;FN4/EFN1;EFN2;EFN3	B9RC10	Glucose-methanol-choline (Gmc) oxidoreductase, putative OS=Ricinus communis GN=RCOM_1683180 PE=4 SV=1	GMC oxidoreductase	-	-	-	-	S	8	36000000	1800000		16000000	1.79333e+07	21000000	4400000		12700000	0.71	0.74
FN and EFN	FN3;FN4/EFN1;EFN2	B9RAL0	Glyceraldehyde-3-phosphate dehydrogenase OS=Ricinus communis GN=RCOM_1507100 PE=3 SV=1	Glyceraldehyde 3-phosphate dehydrogenase, C-terminal domain	-	-	-	-	M	7			4700000		4700000	18000000	6100000		12050000	2.56	-
FN and EFN	FN1;FN2;FN3;FN4/EFN1;EFN2	B9SMA9	Laccase OS=Ricinus communis GN=RCOM_0298350 PE=3 SV=1	Multicopper oxidase	-	-	-	-	S	10	370000000	240000000	42000000	41000000	173250000	280000000	560000000		420000000	2.42	0.17
FN and EFN	FN1;FN2/EFN1;EFN2	B9RS28	Mta/sah nucleosidase, putative OS=Ricinus communis GN=RCOM_0802270 PE=4 SV=1	Phosphorylase superfamily	-	-	-	-	S	5	25000000	8700000			16850000	80000000	220000000		150000000	8.9	0.2
FN and EFN	FN1;FN4/EFN1;EFN2	B9S225	Mta/sah nucleosidase, putative OS=Ricinus communis GN=RCOM_1326370 PE=4 SV=1	Phosphorylase superfamily	-	-	-	-	S	6	4900000				4900000	60000000	30000000		45000000	9.18	-
FN and EFN	FN1;FN2/EFN1;EFN2	B9RC65	Osmotin, putative OS=Ricinus communis GN=RCOM_1685840 PE=4 SV=1	Thaumatin family	-	-	-	-	S	8	180000000	7000000			93500000	770000000	110000000		440000000	4.71	0.42
FN and EFN	FN1;FN2;FN3/EFN1;EFN2	B9RU20	Pectinesterase OS=Ricinus communis GN=RCOM_1460660 PE=4 SV=1	Pectinesterase	-	-	-	-	*	11	31000000	3400000	8600000		1.43333e+07	44000000	100000000	9600000	51200000	3.57	0.25
FN and EFN	FN1;FN2;FN3;FN4/EFN1;EFN2	B9RA18	Pectinesterase OS=Ricinus communis GN=RCOM_1502820 PE=4 SV=1	Pectinesterase	-	-	-	-	S	5	4500000	6000000	48000000	35000000	23375000	1800000	3400000		2600000	0.11	0.27
FN and EFN	FN1;FN2;FN4/EFN1;EFN2;EFN3	B9S4B6	Peroxidase OS=Ricinus communis GN=RCOM_0688840 PE=3 SV=1	Peroxidase	-	-	-	-	S	7	28000000	9900000		8900000	15600000	44000000	49000000	5800000	3.29333e+07	2.11	0.31
FN and EFN	FN3;FN4/EFN1;EFN2	B9SP64	Phosphoglucomutase, putative OS=Ricinus communis GN=RCOM_0628900 PE=3 SV=1	Phosphoglucomutase/phosphomannomutase, alpha/beta/alpha domain I	-	-	-	-	_	2			3100000	3100000	3100000	1000000	1700000		1350000	0.44	0.04
FN and EFN	FN1;FN3/EFN1;EFN2;EFN3	B9RCG6	Polygalacturonase, putative OS=Ricinus communis GN=RCOM_1688080 PE=3 SV=1	Glycosyl hydrolases family 28	-	-	-	-	S	4	7200000		2800000		5000000	64000000	41000000	3500000	3.61667e+07	7.23	0.27
FN and EFN	FN1;FN2;FN3;FN4/EFN1;EFN2;EFN3	B9SXP3	Putative uncharacterized protein OS=Ricinus communis GN=RCOM_0003530 PE=4 SV=1	Prolamin-like	F4K8A7	proteína da família de gametogênese ECA1 (Arabdopisis thaliana)	-	-	S	3	3600000000	360000000	8800000000	18000000000	7690000000	6000000000	8300000000	7500000000	7266666667	0.94	0.93
FN and EFN	FN1;FN2;FN3;FN4/EFN1;EFN2	B9RJG5	Putative uncharacterized protein OS=Ricinus communis GN=RCOM_1034120 PE=3 SV=1	Cellulase (glycosyl hydrolase family 5)	A0A061FH80	Cellulase containing protein, expressed (Theobroma cacao)	XP_002513884.1	PREDICTED: probable glucan 1,3-beta-glucosidase A (Ricinus communis)	S	14	4900000	740000	5000000	1900000	3135000	34000000	34000000		34000000	10.85	0
FN and EFN	FN1;FN2;FN4/EFN1;EFN2	B9T0V6	Putative uncharacterized protein OS=Ricinus communis GN=RCOM_1439700 PE=4 SV=1	Ferritin-like domain	A0A1U8L2I8	desiccation-related protein PCC13-62-like (Gossypium hirsutum)	XP_002531875.1	PREDICTED: desiccation-related protein PCC13-62 (Ricinus communis)	S	8	40000000	9300000		21000000	2.34333e+07	530000000	290000000		410000000	17.5	0.02
FN and EFN	FN1;FN2/EFN1;EFN2	B9SAZ8	Reticuline oxidase, putative OS=Ricinus communis GN=RCOM_1335770 PE=4 SV=1	FAD binding domain	-	-	-	-	S	18	7500000	1300000			4400000	28000000	37000000		32500000	7.39	0.04
FN and EFN	FN1;FN4/EFN1;EFN2	B9T568	Serine carboxypeptidase, putative OS=Ricinus communis GN=RCOM_0445930 PE=3 SV=1	Serine carboxypeptidase	-	-	-	-	S	8	6200000			1200000	3700000	9100000	35000000		22050000	5.96	0.3
FN and EFN	FN1;FN2;FN3;FN4/EFN1;EFN2	B9RBC9	Structural constituent of cell wall, putative OS=Ricinus communis GN=RCOM_1674270 PE=4 SV=1	Pollen proteins Ole e I like	-	-	-	-	S	8	400000000	120000000		46000000	1.88667e+08	300000000	470000000		385000000	2.04	0.29
FN and EFN	FN1;FN3/EFN1;EFN2;EFN3	B9SZ66	Wound-induced protein WIN1, putative OS=Ricinus communis GN=RCOM_0484440 PE=4 SV=1	Barwin family	-	-	XP_002531285.1	PREDICTED: pathogenesis-related protein PR-4 (Ricinus communis)	S	4	2700000		4700000		3700000	67000000	12000000	40000000	3.96667e+07	10.72	0.18
FN and EFN	FN1;FN3/EFN1;EFN2;EFN3	B9SZ67	Wound-induced protein WIN1, putative OS=Ricinus communis GN=RCOM_0484450 PE=4 SV=1	Barwin family	-	-	XP_002531286.1	PREDICTED: pathogenesis-related protein PR-4 (Ricinus communis)	S	3	12000000		90000000		51000000	200000000	190000000		195000000	3.82	0.07
FN and EFN	FN1;FN4/EFN1;EFN2;EFN3	B9T8L6	Zinc finger protein, putative OS=Ricinus communis GN=RCOM_0309210 PE=4 SV=1	GDSL-like Lipase/Acylhydrolase	-	-	XP_002534585.1	PREDICTED: GDSL esterase/lipase 1 (Ricinus communis)	_	5	17000000			7200000	12100000	34000000	16000000	3900000	1.79667e+07	1.48	0.65
